# Supplementary material for: Topographic stresses affect stress changes caused by megathrust earthquakes and condition aftershock seismicity in forearcs: Insights from mechanical models and the Tohoku-Oki and Maule earthquakes
Source: Copernicus journal article supplement (doi:10.5194/egusphere-2024-3592), 2024-11-27
Supplement: Supplementary file 1 [file egusphere-2024-3592-supplement.pdf]

*Supplement of*

5 **Topographic stresses affect stress changes caused by megathrust earthquakes and condition aftershock seismicity in forearcs: Insights from mechanical models and the Tohoku-Oki and Maule earthquakes**

Armin Dielforder<sup>1</sup>, Gian Maria Bocchini<sup>2</sup>, Andrea Hampel<sup>1</sup>

<sup>1</sup>Institut für Erdsystemwissenschaften, Abteilung Geologie, Leibniz Universität Hannover, Hannover, 30167, Germany

10 <sup>2</sup>Institut für Geologie, Mineralogie und Geophysik, Ruhr-Universität Bochum, Bochum, 44801, Germany

*Correspondence to:* Armin Dielforder ([dielforder@geowi.uni-hannover.de](mailto:dielforder@geowi.uni-hannover.de))

- Figs. S1 and S2

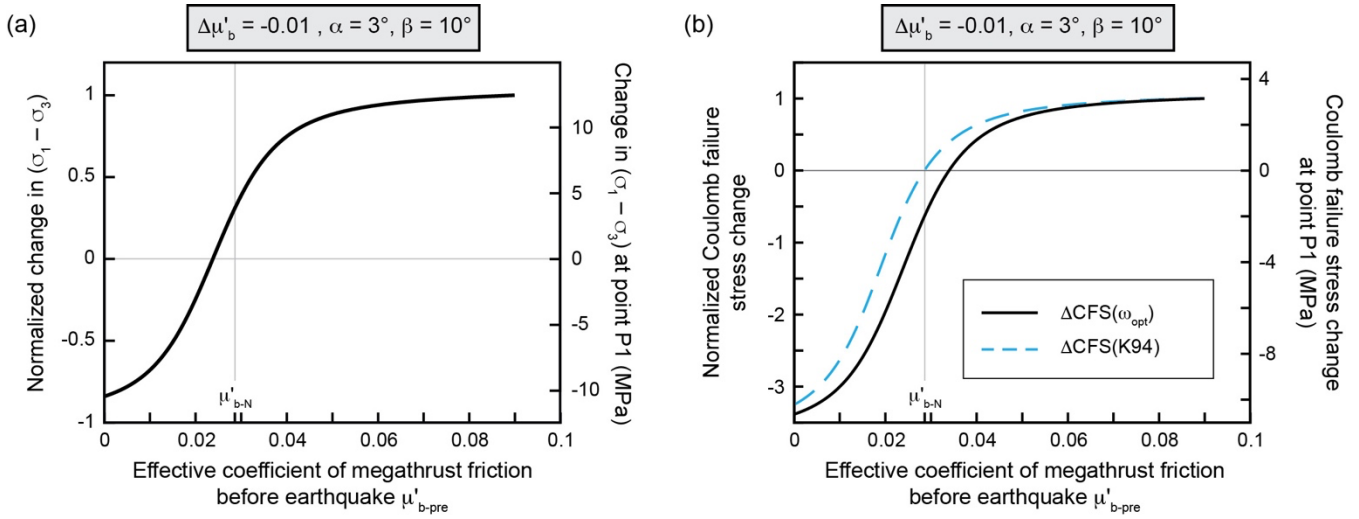

15

**Figure S1: Stress changes due to a negative megathrust stress drop. The stress drop is given in terms of the change in effective coefficient of megathrust friction  $\Delta\mu'_{b}$ , with  $\Delta\mu'_{b} = -0.01$ . Solutions for the reference wedge model discussed in the main text. (a) Change in differential stress ( $\sigma_1 - \sigma_3$ ). Left ordinate shows the change in  $(\sigma_1 - \sigma_3)$  normalized to the maximum change in  $(\sigma_1 - \sigma_3)$ . Right ordinate shows the change in  $(\sigma_1 - \sigma_3)$  at point P1 located at 75 km distance from the wedge tip and at 10 km depth. (b) Coulomb failure stress change as function of  $\Delta\mu'_{b}$ . Black solid lines indicate  $\Delta CFS(\omega_{opt})$  values, blue dashed lines indicate conventional  $\Delta CFS(K94)$  values following King et al. (1994). Left ordinate shows the Coulomb failure stress change normalized to the maximum  $\Delta CFS(\omega_{opt})$  value. Right ordinate indicates the Coulomb failure stress change at point P1 located at 75 km distance from the wedge tip and at 10 km depth. Compare Figs. 3 and 5 in the main text.**

20

25

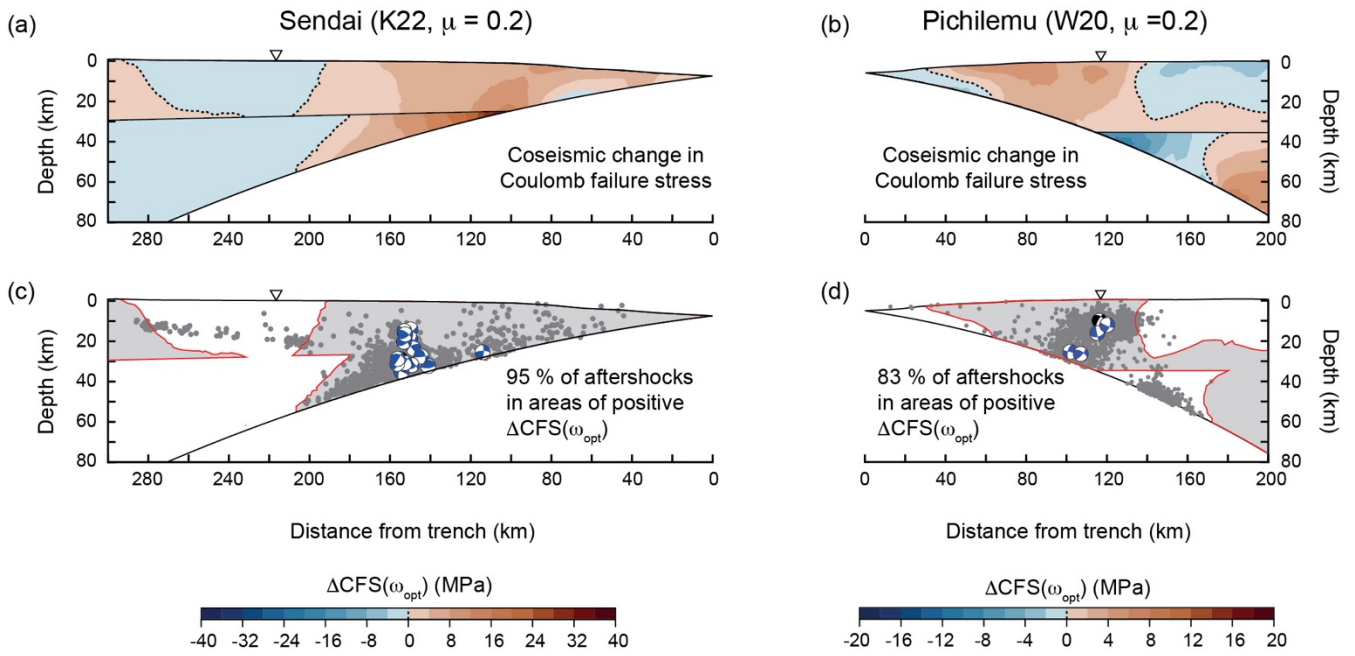

**Figure S2: Supplementary Coulomb failure stress models for the Sendai cross section, Japan, (left) and the Pichilemu cross section, Chile (right). (a) Coulomb failure stress change  $\Delta CFSt(\omega_{opt})$  obtained for the stress-drop model of Kubota et al. (2022) (K22) and coefficient of friction  $\mu = 0.2$ . (b)  $\Delta CFSt(\omega_{opt})$  obtained for the stress-drop model of Wang et al. (2020) (W20) and coefficient of friction  $\mu = 0.2$ . (c) 95 % of aftershocks in areas of positive  $\Delta CFSt(\omega_{opt})$ . (d) 83 % of aftershocks in areas of positive  $\Delta CFSt(\omega_{opt})$ .**

30
